# Supplementary material for: A Comparison of Aerodynamic Parameters in Two Subspecies of the American Barn Owl (Tyto furcata)
Source: MDPI journal article supplement (doi:10.3390/ani12192532), 2022-09-22
Supplement: s1 [file s1]

**Table S2.** Data from other studies used in Figure 4

| Number | Species               | Author <sup>1</sup> | Log10 body mass (kg) <sup>2</sup> | Page <sup>3</sup> | Log10 wing loading (N/m <sup>2</sup> ) <sup>4</sup> |
|--------|-----------------------|---------------------|-----------------------------------|-------------------|-----------------------------------------------------|
| 1      | Snowy Owl             | Johnson             | 0.1414                            |                   | 1.7281                                              |
| 2      | Great Horned Owl      | Johnson             | 0.1285                            |                   | 1.7243                                              |
| 3      | Eastern Screech Owl   | Johnson             | -0.7223                           |                   | 1.5964                                              |
| 4      | Great Grey Owl        | Johnson             | 0.0588                            |                   | 1.5599                                              |
| 5      | Northern Pygmy-Owl    | Johnson             | -1.2295                           |                   | 1.5394                                              |
| 6      | Barred Owl            | Johnson             | -0.1662                           |                   | 1.4959                                              |
| 7      | Short-Eared Owl       | Johnson             | -0.4581                           |                   | 1.5102                                              |
| 8      | American Barn Owl     | Johnson             | -0.3093                           |                   | 1.4968                                              |
| 9      | Western Screech Owl   | Johnson             | -0.7501                           |                   | 1.4688                                              |
| 10     | Northern Spotted Owl  | Johnson             | -0.2063                           |                   | 1.4571                                              |
| 11     | Boreal Owl            | Johnson             | -0.8534                           |                   | 1.4450                                              |
| 12     | Burrowing Owl         | Johnson             | -0.8368                           |                   | 1.4166                                              |
| 13     | Long-Eared Owl        | Johnson             | -0.5841                           |                   | 1.3200                                              |
| 14     | Flammulated Owl       | Johnson             | -1.2204                           |                   | 1.3097                                              |
| 15     | Northern Saw-Whet Owl | Johnson             | -1.0391                           |                   | 1.3458                                              |
| 16     | Eagle Owl             | Mikkola             | 0.4194                            | 72                | 1.8429                                              |
| 17     | Great Grey Owl        | Mikkola             | 0.0128                            | 179               | 1.5357                                              |
| 18     | Ural Owl              | Mikkola             | -0.1824                           | 163               | 1.5231                                              |
| 19     | Tawny Owl             | Mikkola             | -0.2928                           | 138               | 1.5937                                              |
| 20     | Short-Eared Owl       | Mikkola             | -0.4196                           | 234               | 1.5231                                              |
| 21     | Long-Eared Owl        | Mikkola             | -0.5122                           | 214               | 1.4830                                              |
| 22     | European Barn Owl     | Mikkola             | -0.4685                           | 39                | 1.4541                                              |
| 23     | Tengmalm's Owl        | Mikkola             | -0.8386                           | 257               | 1.4541                                              |
| 24     | Pygmy Owl             | Mikkola             | -1.2076                           | 113               | 1.4066                                              |

<sup>1</sup>References [14] (Johnson) and [29] (Mikkola)

<sup>2</sup>Data from column named "Weight" in Table 1 of [14] and from the different pages as specified in the next column from [29], mean values across males and females and across the different studies mentioned in the references

<sup>3</sup>page number in [29] from which body mass data were taken

<sup>4</sup>Data from column named "Wing-loading" in Table 1 of [14] (mean values across males and females and across the different studies) and from Table 2 in [29]
