# Supplementary material for: A Comparison of Aerodynamic Parameters in Two Subspecies of the American Barn Owl (Tyto furcata)
Source: MDPI journal article supplement (doi:10.3390/ani12192532), 2022-09-22
Supplement: s1 [file s1]

**Table S1.** Body-mass measurements of Galapagos barn owls

| Number | Code of bird | Sex    | Date of measurement | Body mass kg) | Mean (kg) | Log (body mass) |
|--------|--------------|--------|---------------------|---------------|-----------|-----------------|
| 1      | N024501      | male   | 2017                | 0.240         | 0.227     | -0.644          |
|        |              |        | 2018                | 0.220         |           |                 |
|        |              |        | 2019                | 0.220         |           |                 |
| 2      | N024502      | female | 2017                | 0.250         | 0.247     | -0.607          |
|        |              |        | 2018                | 0.240         |           |                 |
|        |              |        | 2019                | 0.250         |           |                 |
| 3      | N024503      | male   | 2018                | 0.240         | 0.235     | -0.629          |
|        |              |        | 2019                | 0.230         |           |                 |
| 4      | N024504      | male   | 2018                | 0.235         | 0.235     | -0.629          |
| 5      | N024507      | female | 2019                | 0.270         | 0.270     | -0.569          |
| 6      | N025509      | female | 2019                | 0.235         | 0.235     | -0.629          |
| 7      | Royal Palm   | female | 2017                | 0.275         | 0.275     | -0.561          |
| 8      | N024524      | male   | 2019                | 0.240         | 0.240     | -0.620          |
| 9      | Thorvaldo    | female | 2017                | 0.270         | 0.270     | -0.569          |
| 10     | N024505      | female | 2018                | 0.270         | 0.253     | -0.598          |
|        |              |        | 2018                | 0.235         |           |                 |
| 11     | N024506      | female | 2018                | 0.290         | 0.290     | -0.538          |
